# Supplementary material for: Delineation of the genetic and clinical spectrum of Phelan-McDermid syndrome caused by SHANK3 point mutations
Source: Springer Nature journal article supplement (doi:10.1186/s13229-018-0205-9), 2018-04-27
Supplement: MOESM2 [file 15725632]

**Table S5.** Descriptive and diagnostic data by patient

| Subject | Age (y) | NVIQ estimate (standard score/DQ) | Vineland Adaptive Behavior Scales-II (standard score) |               |               |              |       | ADI-R <sup>a</sup> |         |         | ADOS-2 <sup>b</sup> |               |                                  |               | DSM-5 | Consensus diagnosis | Peabody Picture Vocabulary Test-4 (standard score) | Expressive Vocabulary Test-2 (standard score) |                |
|---------|---------|-----------------------------------|-------------------------------------------------------|---------------|---------------|--------------|-------|--------------------|---------|---------|---------------------|---------------|----------------------------------|---------------|-------|---------------------|----------------------------------------------------|-----------------------------------------------|----------------|
|         |         |                                   | ABC                                                   | Communication | Socialization | Daily Living | Motor | A: Social          | B: Comm | C: RRSB | Module              | Social Affect | Restricted & Repetitive Behavior | Overall Total |       |                     |                                                    |                                               | Severity Score |
| S1      | 12      | 10.4                              | 33                                                    | 36            | 38            | 33           | 56    | 23                 | 13      | 6       | 1                   | 20            | 7                                | 27            | 10    | ASD                 | ASD                                                | ND                                            | ND             |
| S2      | 5       | 30.6                              | 49                                                    | 44            | 55            | 43           | 61    | 16                 | 12      | 3       | 1                   | 16            | 3                                | 19            | 6     | ASD                 | ASD                                                | ND                                            | ND             |
| S3      | 7       | 18.8                              | 49                                                    | 45            | 51            | 52           | 40    | 17                 | 10      | 7       | 1                   | 2             | 3                                | 5             | 2     | No ASD              | No ASD                                             | ND                                            | ND             |
| S4      | 3       | 19.5                              | 55                                                    | 49            | 68            | 55           | 59    | 13                 | 12      | 2       | 1                   | 19            | 7                                | 26            | 10    | ASD                 | ASD                                                | ND                                            | ND             |
| S6      | 5       | 35                                | 53                                                    | 54            | 49            | 53           | 64    | 25                 | 21      | 6       | 1                   | 15            | 5                                | 20            | 8     | ASD                 | ASD                                                | ND                                            | ND             |
| S7      | 7       | 74                                | 75                                                    | 75            | 87            | 69           | 75    | 12                 | 11      | 1       | 3                   | 12            | 3                                | 15            | 9     | No ASD              | No ASD                                             | 75                                            | 70             |
| S8      | 9       | 14.6                              | 53                                                    | 53            | 51            | 54           | 59    | 28                 | 14      | 6       | 1                   | 20            | 8                                | 28            | 10    | ASD                 | ASD                                                | ND                                            | ND             |
| S10     | 9       | 60                                | 72                                                    | 72            | 78            | 71           | 88    | 6                  | 4       | 3       | 3                   | 5             | 1                                | 6             | 3     | No ASD              | No ASD                                             | 78                                            | 70             |
| S11     | 6       | 17.3                              | 42                                                    | 36            | 53            | 34           | 51    | 28                 | 14      | 7       | 1                   | 18            | 2                                | 20            | 7     | ASD                 | ASD                                                | ND                                            | ND             |
| S12     | 42      | 0.97                              | ND                                                    | ND            | ND            | ND           | ND    | ND                 | ND      | ND      | ND                  | ND            | ND                               | ND            | ND    | ND                  | ND                                                 | ND                                            | ND             |
| S13     | 15      | 15.5                              | 36                                                    | 37            | 43            | 35           | 59    | 29                 | 13      | 4       | 1                   | 14            | 5                                | 19            | 6     | ASD                 | ASD                                                | ND                                            | ND             |
| S14     | 4       | 33                                | 49                                                    | 42            | 61            | 46           | 56    | 21                 | 13      | 5       | 1                   | 18            | 2                                | 20            | 7     | ASD                 | ASD                                                | 60                                            | ND             |

<sup>a</sup> ADI-R cutoff scores for autism are: Social = 10, Communication (nonverbal) = 7, Repetitive behaviors and restricted interests = 3.

<sup>b</sup> ADOS-2 Module 1 (Pre-verbal/single words) cutoff scores for autism and ASD are 16 and 11 for *few to no words*, and 12 and 8 for *some words*. ADOS-2 Module 3 (Fluent speech) cutoff scores for autism and ASD are 9 and 7, respectively.

ABC Adaptive Behavior Composite, ADI-R Autism Diagnostic Interview-Revised, A: *Social* Qualitative abnormalities in reciprocal social interaction, B: *Comm* Communication, C: *RRSB* Restricted, repetitive, or stereotyped patterns of behavior, ADOS-2 Autism Diagnostic Observation Schedule, Second edition, DQ developmental quotient, DSM-5 Diagnostic and Statistical Manual of Mental Disorders, Fifth edition, IQ intellectual quotient, NVIQ nonverbal IQ, ND not done, y years

**Table S6.** ASD and intellectual ability classifications in individuals with *SHANK3* mutations

| Classification                     | n | %  |
|------------------------------------|---|----|
| ASD classification (n=11)          |   |    |
| ASD classification on ADOS         | 9 | 82 |
| ASD classification on ADI-R        | 8 | 73 |
| Consensus diagnosis of ASD         | 8 | 73 |
| Nonverbal IQ classification (n=12) |   |    |
| Mild ID (IQ 55-69)                 | 2 | 17 |
| Severe ID (IQ 25-40)               | 3 | 25 |
| Profound ID (IQ <25)               | 7 | 58 |

ASD autism spectrum disorder, *ADI-R* Autism Diagnostic Interview-Revised, *ADOS-2* Autism Diagnostic Observation Schedule, Second Edition, *ID* intellectual disability, *IQ* intellectual quotient

**Table S7.** Language and motor functioning in individuals with *SHANK3* mutations

| Domain              | Mean age equivalent $\pm$ SD in months (range) |
|---------------------|------------------------------------------------|
| <b>Language</b>     |                                                |
| Receptive language  |                                                |
| Mullen              | 10.0 $\pm$ 3.1 (5-14)                          |
| Vineland-II         | 12.6 $\pm$ 5.3 (6-21)                          |
| Expressive language |                                                |
| Mullen              | 7.9 $\pm$ 6.0 (2-23)                           |
| Vineland-II         | 10.2 $\pm$ 4.2 (7-21)                          |
| <b>Motor</b>        |                                                |
| Fine motor skills   |                                                |
| Mullen              | 16.7 $\pm$ 5.3 (9-27)                          |
| Vineland-II         | 20.4 $\pm$ 10.5 (6-36)                         |
| Gross motor skills  |                                                |
| Mullen              | 22.2 $\pm$ 4.7 (16-28)                         |
| Vineland-II         | 26.8 $\pm$ 6.1 (17-36)                         |

Language and motor age equivalents in individuals assessed with both the Mullen Scales of Early Learning and the Vineland Adaptive Behavior Scales II (n=9; S1-S4, S6, S8, S11, S13, and S14).
