# Supplementary material for: Delineation of the genetic and clinical spectrum of Phelan-McDermid syndrome caused by SHANK3 point mutations
Source: Mol Autism. 2018 Apr 27;9:31. doi: 10.1186/s13229-018-0205-9 (PMC5921983; doi:10.1186/s13229-018-0205-9)
Supplement: Supplementary file 1 — Table S1. Loss of function and de novo missense variants in SHANK3 reported previously. Table S2. Clinical features of individuals with pathogenic or likely pathogenic SHANK3 variants reported in the literature. Table S3. In silico prediction of pathogenicity of missense variants in SHANK3 identified in this study and in the literature. Table S4. Reported truncating and in-frame variants in SHANK3 unlikely to be pathogenic. (XLSX 84 kb) [file 13229_2018_205_MOESM1_ESM.xlsx]

## Sheet: Table S1
Table S1. Loss of function and de novo missense variants in SHANK3 reported previously.
			Information reported in the original paper/database								Information reannotated
Individual	Study	PMID	Patient or variation ID	Coding DNA change	Protein change	Genomic change	Inheritance	Sex	Diagnosis	Country of origin	Coding DNA change	Protein change	Genomic change	Effect	HGMD ID	Frequency in gnomAD	Variant classificationa	Comments
Pathogenic or likely pathogenic variants
1	Boccuto (2013) Eur J Hum Genet	22892527	12718	NM_001080420.1:c.421C>G	p.Pro141Ala	NA	De novo	F	Autism, ID, seizures	African American, South Carolina, USA	NM_033517.1:c.421C>G	p.Pro141Ala	chr22:g.51117094C>G	Missense	CM131283	0	Likely pathogenic	Multiple lines of computational evidence support a deleterious effect (Table S3)
2	Hamdan (2011) Am J Hum Genet	21376300	6	NM_001080420.1:c.601-1G>A	NA	NA	De novo	M	Mild ID, severe language impairment, no ASD	Canada	NG_008607.2(NM_033517.1):c.601-1G>A	p.?	chr22:g.51117446G>A	Splice site	CS111828	0	Pathogenic
3	Yuen (2015) Nat Med	25621899	3-0107_00	NM_033517.1:c.925_926del	p.309_309del	chr22:51121807-51121808del	De novo	M	ASD	Canada	NM_033517.1:c.925_926delAG	p.Arg309Glyfs*21	chr22:g.51121807_51121808delAG	Frameshift	CD153111	0	Pathogenic
4	Moessner (2007) Am J Hum Genet b	17999366	SK0007 (family ASD4)	NM_033517.1:c.962A>G	p.Q321R	NA	De novo	F	Autism, ID	Arabic European, Canada	NM_033517.1:c.962A>G	p.Gln321Arg	chr22:g.51121844A>G	Missense	CM075006	0 (22:51121844A>C (rs780798381) (p.Gln321Pro) present once)	Likely pathogenic	Multiple lines of computational evidence support a deleterious effect (Table S3)
5	ClinVar (Praxis fuer Humangenetik Tuebingen)	NA	425285	NM_033517.1:c.1362_1363insC	p.Ala457Argfs	chr22:51136008insC	NA	NA	NA	Germany	NM_033517.1:c.1368dupC	p.Ala457Argfs*31	chr22:g.51136008insC	Frameshift	NA	0	Likely pathogenic
6	ClinVar (Praxis fuer Humangenetik Tuebingen)	NA	425286	NM_033517.1:c.1495delA	p.Lys499Argfs	chr22:51136140delA	NA	NA	NA	Germany	NM_033517.1:c.1496delA	p.Lys499Argfs*15	chr22:g.51136140delA	Frameshift	NA	0	Likely pathogenic
7	De Rubeis (2014) Nature	25363760	8000110220	NA	C525*	chr22:51137191C>A	NA	M	ASD	Sweden	NM_033517.1:c.1572C>A	p.Cys524*	chr22:g.51137191C>A	Nonsense	NA	0	Likely pathogenic
8	Gauthier (2010) Proc Natl Acad Sci USA	20385823	NA	NA	R536W	NA	De novo	F	Schizoaffective disorder, borderline ID	Canada	NM_033517.1:c.1606C>T	p.Arg536Trp	chr22:g.51137225C>T	Missense	CM102471	0 (22:51137225C>G (rs387906933) (p.Arg536Gly) present once)	Likely pathogenic	In silico predictions of pathogenicity disagree (Table S3)
9	ClinVar (GeneDx)	NA	432387	NM_033517.1:c.1772-2A>C	NA	chr22:51143164A>C	NA	NA	NA	USA	NG_008607.2(NM_033517.1):c.1772-2A>C	p.?	chr22:g.51143164A>C	Splice site	NA	0	Likely pathogenic
10	ClinVar (GeneDx)	NA	430433	NM_033517.1:c.2104G>T	p.Glu702Ter	chr22:51144574G>T	NA	NA	NA	USA	NM_033517.1:c.2104G>T	p.Glu702*	chr22:g.51144574G>T	Nonsense	NA	0	Likely pathogenic
11	Gauthier (2009) Am J Med Genet B	18615476	NA	c.2265C+1delG [NM_033517.1]	S755Sfs × 1	NA	De novo	M	Autism	Canada	NG_008607.2(NM_033517.1):c.2265+1delG	p.Ser755Serfs*1	chr22:g.51153476delG	Splice site (with functional frameshift confirmed)	CD087329	0	Pathogenic
12	Bramswig (2015) Hum Genet	25724810	K2512	NM_033517.1:c.2265+1G>A	NA	chr22:g.51153476G>A c	De novo	M	Autism, ID, seizures	Patients from Germany, Turkey, Italy, Spain, Switzerland, Poland	NG_008607.2(NM_033517.1):c.2265+1G>A	p.?	chr22:g.51153476G>A	Splice site	CS154699	0	Pathogenic
13	Holder (2016) Epilepsia	27554343	21	NM_001080420.1:c.2313 + 1G>A	NA	NA	De novo d	F	Phelan-McDermid syndrome	Baylor College of Medicine, Houston, USA	NG_008607.2(NM_033517.1):c.2265+1G>A	p.?	chr22:g.51153476G>A	Splice site	NA	0	Pathogenic
14	Yuen (2017) Nat Neurosci	28263302	7-0123-003	NA	NA	22:51153475-51153476:G:A	De novo	M d	ASD	Canada d	NG_008607.2(NM_033517.1):c.2265+1G>A	p.?	chr22:g.51153476G>A	Splice site	NA	0	Pathogenic
15	ClinVar (GeneDx)	NA	423608	NM_033517.1:c.2328delG	p.Ile777Phefs	chr22:51154159delG	NA	NA	NA	USA	NM_033517.1:c.2328delG	p.Ile777Phefs*7	chr22:g.51154159delG	Frameshift	NA	0	Likely pathogenic
16	Leblond (2014) PLoS Genet e	25188300	AUN_003	NA	p.E809X	g.51158686G>T	De novo	F	Autism, ID	France	NM_033517.1:c.2425G>T	p.Glu809*	chr22:g.51158686G>T	Nonsense	CM149525	0	Pathogenic	This is the same patient
	Serret (2015) BMC Psychiatry	25947967	2	c.2425G>T [NM_033517.1]	p.Glu809X	NA	De novo d	F	ASD, ID, catatonia, atypical bipolar	France	NM_033517.1:c.2425G>T	p.Glu809*	chr22:g.51158686G>T	Nonsense	CM149525 (listed by mistake as an additional case report)
17	ClinVar (GeneDx)	NA	373766	NM_033517.1:c.2613C>G	p.Tyr871Ter	chr22:g.51158874C>G	NA	NA	NA	USA	NM_033517.1:c.2613C>G	p.Tyr871*	chr22:g.51158874C>G	Nonsense	NA	0	Likely pathogenic
18	ClinVar (GeneDx)	NA	265676	NM_033517.1:c.2695delG	p.Ala899Argfs	chr22:g.51158956delG	NA	NA	NA	USA	NM_033517.1:c.2695delG	p.Ala899Argfs*57	chr22:g.51158956delG	Frameshift	NA	0	Likely pathogenic
19	Yuen (2017) Nat Neurosci	28263302	1-0726-003	NM_033517:c.2808dupC	p.R936fs	22:51159109-51159110:G:GC	NA	NA	ASD	Canada	NM_033517.1:c.2850dupC	p.Lys951Glnfs*345	chr22:g.51159111dupC	Frameshift	NA	0	Likely pathogenic
20	Yuen (2017) Nat Neurosci	28263302	AU009805	NA	NA	22:51159130-51159132:AG:A	De novo (mosaic?)	NA	ASD	AGRE, USA	NM_033517.1:c.2871delG	p.Gln957Hisfs*121	chr22:g.51159132delG	Frameshift	NA	0	Pathogenic
21	Redin (2014) J Med Genet	25167861	APN-122	NM_001080420.1:c.2955_2970dup	p.Pro992Argfs*325	chr22:g.51159168_51159183dup	De novo	F	ID, autistic traits	France	NM_033517.1:c.2909_2924dupCCGTGGGCAGCCCCGG	p.Pro976Argfs*325	chr22:g.51159170_51159185dupCCGTGGGCAGCCCCGG	Frameshift	NA	0	Pathogenic
22	ClinVar (GeneDx)	NA	280713	NM_033517.1:c.2928delC	p.Gly977Alafs	chr22:g.51159189delC	NA	NA	NA	USA	NM_033517.1:c.2928delC	p.Gly977Alafs*101	chr22:g.51159189delC	Frameshift	NA	0	Likely pathogenic
23	Gong (2012) PLoS One	22509352	NA	NA	Y1015X	NA	De novo	M	ID, epilepsy	China	NM_033517.1:c.2997C>G	p.Tyr999*	chr22:g.51159258C>G	Nonsense	CM122907	0	Pathogenic
24	Leblond (2014) PLoS Genet	25188300	AUN_001	NA	p.P1005Rfs*73	g.51159275delC	Not maternal	F	Autism, ID	France	NM_033517.1:c.3014delC	p.Pro1005Argfs*73	chr22:g.51159275delC	Frameshift	CD149529	0	Likely pathogenic
25	Hara (2015) Am J Med Genet A	25931020	NA	NM_033517.1:c.3100del	p.Ala1034fs*44	NA	De novo	F	Autistic behavior, seizures, Rett-like phenotype	Japan	NM_033517.1:c.3100delG	p.Ala1034Profs*44	chr22:g.51159361delG	Frameshift	CD156316	0	Pathogenic
26	ClinVar (GeneDx)	NA	430176	NM_033517.1:c.3186delC	p.Thr1063Profs	chr22:51159447delC	NA	NA	NA	USA	NM_033517.1:c.3186delC	p.Thr1063Profs*15	chr22:g.51159447delC	Frameshift	NA	0	Likely pathogenic
27-29	Nemirovsky (2015) PLoS One	25646853	3 affected brothers: III-1-3	NM_033517:c.3259_3259delC	p.Ser1088Profs*6	NA	De novo (germline mosaicism)	M, M, M	Severe ID, autism spectrum features, epilepsy	Argentina	NM_033517.1:c.3213delC	p.Ser1072Profs*6	chr22:g.51159474delC	Frameshift	CD150925	0	Pathogenic
30	Leblond (2014) PLoS Genet	25188300	AU084_4	NA	A1076Efs*218	g.51159488-51159492delCCCTG	De novo	M	Autism, ID	France	NM_033517.1:c.3227_3231delCCCTG	p.Ala1076Glufs*218	chr22:g.51159488_51159492delCCCTG	Frameshift	CD149530	0	Pathogenic
31	ClinVar (GeneDx)	NA	419513	NM_033517.1:c.3255_3259delCCTGG	p.Ser1085Argfs	chr22:51159516-51159520delCCTGG	NA	NA	NA	USA	NM_033517.1:c.3255_3259delCCTGG	p.Ser1085Argfs*209	chr22:g.51159516_51159520delCCTGG	Frameshift	NA	0	Likely pathogenic
32	Retterer (2016) Clin Genet	26633542	NA	(c.3301C>T) f	(p.R1101*) f	chr22:51159604C>T	NA	NA	Abnormality of the nervous system (indicates patients with multiple neurological diagnoses, such as ID, ASD, and epilepsy)	Patients referred for genetic testing to GeneDx, USA	NM_033517.1:c.3343C>T	p.Arg1115*	chr22:g.51159604C>T	Nonsense	NA	0	Likely pathogenic
33-35	Gauthier (2010) Proc Natl Acad Sci USA	20385823	3 affected brothers: II-1-3	NA	R1117X	NA	De novo (germline mosaicism)	M, M, M	Schizophrenia, ID	Canada	NM_033517.1:c.3349C>T	p.Arg1117*	chr22:g.51159610C>T	Nonsense	CM102470	0	Pathogenic
36	Leblond (2014) PLoS Genet	25188300	AU921_3	NA	L1142Vfs*153	g.51159685-51159686delCT	De novo	M	Autism, ID, seizures	France	NM_033517.1:c.3424_3425delCT	p.Leu1142Valfs*153	chr22:g.51159685_51159686delCT	Frameshift	CD149531	0	Pathogenic
37	ClinVar (GeneDx)	NA	372707	NM_033517.1:c.3424_3425delCT	p.Leu1142Valfs	chr22:g.51159685_51159686delCT	NA	NA	NA	USA	NM_033517.1:c.3424_3425delCT	p.Leu1142Valfs*153	chr22:g.51159685_51159686delCT	Frameshift	NA	0	Pathogenic	This patient is described in this manuscript (S6)
38	Leblond (2014) PLoS Genet	25188300	AUN_004	NA	p.S1202Cfs*81	g.51159866-51159869delCCCT	De novo	M	Autism, ID	France	NM_033517.1:c.3605_3608delCCCT	p.Ser1202Cysfs*81	chr22:g.51159866_51159869delCCCT	Frameshift	CD149532	0	Pathogenic	This is the same patient
	Serret (2015) BMC Psychiatry	25947967	1	c.3653_3656delCCCT [NM_001080420.1]	p.Ser1218CysfsX81	NA	De novo d	M	ASD, ID, catatonia, atypical bipolar	France	NM_033517.1:c.3605_3608delCCCT	p.Ser1202Cysfs*81	chr22:g.51159866_51159869delCCCT	Frameshift	CD149532 (listed by mistake as an additional case report)
39	Fokstuen (2016) Hum Genomics g	27353043	NA	NM_033517.1:c.3637dup	His1213Profs*83	NA	NA	NA	ID, psychotic symptoms	Genome Clinic of the University Hospitals of Geneva, Switzerland	NM_033517.1:c.3637dupC	p.His1213Profs*83	chr22:g.51159898dupC	Frameshift	CI167751	0	Likely pathogenic
40-41	Durand (2007) Nat Genet	17173049	2 brothers: AU016_3, AU016_5 (family ASD2)	insG(3680) [NM_033517.1]	p.A1227Gfs	NA	De novo (germline mosaicism)	M, M	Autism, ID	France	NM_033517.1:c.3679dupG	p.Ala1227Glyfs*69	chr22:g.51159940dupG	Frameshift	CI070562	0	Pathogenic
42	O'Roak (2014) Nat Comm	25418537	14470.p1	ENST00000262795.3:c.3719_3720insG	p.Ala1243GlyfsTer6	chr22:51159932T>TG	De novo	M	ASD	Simons Simplex Collection, USA	NM_033517.1:c.3679dupG	p.Ala1227Glyfs*69	chr22:g.51159940dupG	Frameshift	NA	0	Pathogenic
43	Srivastava (2014) Ann Neurol	25131622	25	NM_001080420.1:c.3727dupG	Ala1243Glyfs*69	NA	De novo	NA	ASD, developmental regression	Child neurology, Kennedy Krieger Institute, USA	NM_033517.1:c.3679dupG	p.Ala1227Glyfs*69	chr22:g.51159940dupG	Frameshift	NA	0	Pathogenic	This is the same patient. This patient is described in this manuscript (S8)
	Farwell (2015) Genet Med h	25356970	NA	NA	p.A1243Gfs*69	NA	De novo	NA	NA	Patients referred for genetic testing to Ambry Genetics, USA	NM_033517.1:c.3679dupG	p.Ala1227Glyfs*69	chr22:g.51159940dupG	Frameshift	CI070562
44	Lelieveld (2016) Nat Neurosci	27479843	DNA1316441B	NM_001080420.1:c.3727dup	A1243fs	chr22:51159932-51159932:G	De novo	NA	ID	Radboud University Medical Center, the Netherlands	NM_033517.1:c.3679dupG	p.Ala1227Glyfs*69	chr22:g.51159940dupG	Frameshift	NA	0	Pathogenic
45	Retterer (2016) Clin Genet i	26633542	NA	c.3679dupG [NM_033517.1]	p.A1227Gfs*69	chr22:g.51159940	NA	NA	Abnormality of the nervous system (indicates patients with multiple neurological diagnoses, such as ID, ASD, and epilepsy)	Patients referred for genetic testing to GeneDx, USA	NM_033517.1:c.3679dupG	p.Ala1227Glyfs*69	chr22:g.51159940dupG	Frameshift	NA	0	Pathogenic	This patient is described in this manuscript (S7)
46	ClinVar (Genetic Services Laboratory, University of Chicago)	NA	436718	NM_033517.1:c.3679delG	p.Ala1227Profs	chr22:51159940delG	NA	NA	NA	USA	NM_033517.1:c.3679delG	p.Ala1227Profs*57	chr22:g.51159940delG	Frameshift	NA	0	Pathogenic
47	Leblond (2014) PLoS Genet	25188300	AU285_4	NA	Q1243X	g.51159988C>T	De novo	M	Autism, ID	France	NM_033517.1:c.3727C>T	p.Gln1243*	chr22:g.51159988C>T	Nonsense	CM149526	0	Pathogenic
48	Leblond (2014) PLoS Genet	25188300	AUN_005	NA	R1255Lfs*25	g.51160025-51160037delGGGCCCAGCCCCC	De novo	M	Autism, ID, seizures	France	NM_033517.1:c.3764_3776delGGGCCCAGCCCCC	p.Arg1255Leufs*25	chr22:g.51160025_51160037delGGGCCCAGCCCCC	Frameshift	CD149533	0	Pathogenic
49	Srivastava (2014) Ann Neurol j	25131622	75	NM_001080420.1:c.3812_3824del13	R1271LfsX25	NA	De novo	NA	ID, ASD, developmental regression	Child neurology, Kennedy Krieger Institute, Baltimore, USA	NM_033517.1:c.3764_3776delGGGCCCAGCCCCC	p.Arg1255Leufs*25	chr22:g.51160025_51160037delGGGCCCAGCCCCC	Frameshift	NA	0	Pathogenic	This patient is described in this manuscript (S9)
50	DDD Study (2017) Nature	28135719	DDD4K.03824	NA	NA	chr22:51160013 TGCCCAGCCCCCGG/T	De novo	F	ID	DDD Study, UK	NM_033517.1:c.3764_3776delGGGCCCAGCCCCC	p.Arg1255Leufs*25	chr22:g.51160025_51160037delGGGCCCAGCCCCC	Frameshift	NA	0	Pathogenic
51	DDD Study (2017) Nature	28135719	DDD4K.00977	NA	NA	chr22:51160013 TGCCCAGCCCCCGG/T	De novo	F	ID	DDD Study, UK	NM_033517.1:c.3764_3776delGGGCCCAGCCCCC	p.Arg1255Leufs*25	chr22:g.51160025_51160037delGGGCCCAGCCCCC	Frameshift	NA	0	Pathogenic
52	Leblond (2014) PLoS Genet k	25188300	AU380_3	NA	G1271Af*15	g.51160070-51160071insGGCCA	De novo	M	Autism, ID	France	NM_033517.1:c.3807_3811dupCCAGG	p.Gly1271Alafs*15	chr22:g.51160068_51160072dupCCAGG	Frameshift	CI149536	0	Pathogenic
53	Retterer (2016) Clin Genet	26633542	NA	c.3913_3920delCAGCTGTC [NM_001080420.1]	p.Q1305Vfs*4	chr22:51160126delCAGCTGTC	NA	NA	Abnormality of the nervous system (indicates patients with multiple neurological diagnoses, such as ID, ASD, and epilepsy)	Patients referred for genetic testing to GeneDx, USA	NM_033517.1:c.3865_3872delCAGCTGTC	p.Gln1289Valfs*4	chr22:g.51160126_51160133delCAGCTGTC	Frameshift	NA	0	Likely pathogenic
54	Boccuto (2013) Eur J Hum Genet	22892527	CMS14055	NM_001080420.1:c.3931delG	p.Glu1311fsX1401	NA	Not maternal	M	ASD, ID, seizures	Italian	NM_033517.1:c.3883delG	p.Glu1295Argfs*91	chr22:g.51160144delG	Frameshift	CD131285	0	Likely pathogenic
55	Leblond (2014) PLoS Genet	25188300	AUN_002	NA	p.G1339Efs*5	g.51160275-51160276delAG	Not maternal	M	Autism, ID, seizures	France	NM_033517.1:c.4014_4015delAG	p.Gly1339Glufs*5	chr22:g.51160275_51160276delAG	Frameshift	CD149535	0	Likely pathogenic
56	ClinVar (Institut de Génétique Médicale, Centre Hospitalier Regional Universitaire de Lille)	NA	375586	NM_033517.1:c.4029_4030delTG	p.Ser1343Argfs	chr22:g.51160290_51160291delTG	De novo	NA	NA	France	NM_033517.1:c.4029_4030delTG	p.Ser1343Argfs*7	chr22:g.51160290_51160291delTG	Frameshift	NA	0	Pathogenic
57	DDD Study (2017) Nature	28135719	DDD4K.03824	NA	NA	chr22:51160342:GACACAC:GACAC	De novo	M	ID	DDD Study, UK	NM_033517.1:c.4086_4087delAC	p.Arg1363Glnfs*31	chr22:g.51160347_51160348delAC	Frameshift	NA	0	Pathogenic
58	ClinVar (GeneDx)	NA	418906	NM_033517.1:c.4109_4110delTG	p.Leu1370Argfs	chr22:51160370-51160371delTG	NA	NA	NA	USA	NM_033517.1:c.4109_4110delTG	p.Leu1370Argfs*24	chr22:g.51160370_51160371delTG	Frameshift	NA	0	Likely pathogenic
59	ClinVar (GeneDx)	NA	430006	NM_033517.1:c.4229delC	p.Pro1410Hisfs	chr22:51160490delC	NA	NA	NA	USA	NM_033517.1:c.4229delC	p.Pro1410Hisfs*18	chr22:g.51160490delC	Frameshift	NA	0	Pathogenic	This patient is described in this manuscript (S10)
60	Thevenon (2016) Clin Genet	26757139	16	NM_001080420.1:c.4381C>T	p.Gln1461*	chr22:g.51160594C>T	De novo	M	ID, ASD, epilepsy	France	NM_033517.1:c.4333C>T	p.Gln1445*	chr22:g.51160594C>T	Nonsense	NA	0	Pathogenic
61	Griswold (2015) Mol Autism	26185613	NA	c.C4360T	p.Q1454X	g.51160663C>T	NA	NA	Autism	USA	NM_033517.1:c.4402C>T	p.Gln1468*	chr22:g.51160663C>T	Nonsense	CM157865	0	Likely pathogenic	These 2 reports describe the same variant without any additional information. Since both studies are from the USA, it is possible that this is the same patient, so we are not counting this variant as recurrent.
	ClinVar (GeneDx)	NA	422407	NM_033517.1:c.4402C>T	p.Gln1468Ter	chr22:51160663C>T	NA	NA	NA	USA	NM_033517.1:c.4402C>T	p.Gln1468*	chr22:g.51160663C>T	Nonsense	NA	0	Likely pathogenic
62	Egger (2017) BMJ Case Rep	28963116	NA	c.4523del [NM_033517.1]	p.Thr1508Serfs*36	NA	NA	M	ASD, ID, atypical bipolar	Netherlands	NM_033517.1:c.4523delC	p.Thr1508Serfs*36	chr22:g.51160784delC	Frameshift	NA	0	Likely pathogenic
63	Yuen (2017) Nat Neurosci	28263302	2-1455-003	NM_033517:c.4491dupG	p.L1497fs	22:51160792-51160798:TGGGGG:TGGGGGG (Table S4), 22:51160792-51160793:T:TG (Table S5)	De novo	NA	ASD	Canada	NM_033517.1:c.4537dupG	p.Glu1513Glyfs*30	chr22:g.51160798dupG	Frameshift	NA	0	Pathogenic
64	ClinVar (GeneDx)	NA	280176	NM_033517.1:c.4565delT	p.Leu1522Argfs	chr22:g.51160826delT	NA	NA	NA	USA	NM_033517.1:c.4565delT	p.Leu1522Argfs*22	chr22:g.51160826delT	Frameshift	NA	0	Likely pathogenic
65	ClinVar (GeneDx)	NA	427096	NM_033517.1:c.4861A>T	p.Lys1621Ter	chr22:51169405A>T	NA	NA	NA	USA	NM_033517.1:c.4861A>T	p.Lys1621*	chr22:g.51169405A>T	Nonsense	NA	0	Likely pathogenic
66	ClinVar (GeneDx)	NA	280221	NM_033517.1:c.4906_4921dup16	p.Pro1641Leufs	chr22:g.51169450-51169465dup16	NA	NA	NA	USA	NM_033517.1:c.4906_4921dupTCCCCCTCGCCGTCGC	p.Pro1641Leufs*58	chr22:g.51169450_51169465dupTCCCCCTCGCCGTCGC	Frameshift	NA	0	Pathogenic	This patient is described in this manuscript (S12)
De novo missense variants of uncertain significance
67	Bowling (2017) Genome Med l	28554332	00263-C	NM_033517.1:c.1010C>G	p.Thr337Ser	NA	De novo	NA	ID (moderate), speech delay, facial dysmorphism	North Alabama Children’s Specialists, Huntsville, AL, USA	NM_033517.1:c.1010C>G	p.Thr337Ser	chr22:g.51123059C>G	Missense	NA	0 (22:51123059C>T (rs869312715) (p.Thr337Ile) present 2 times)	Uncertain significance	In silico predictions of pathogenicity disagree, although the majority predict a neutral/likely benign effect (Table S3)
68	O'Roak (2014) Nat Comm	25418537	217-14410-5190	ENST00000262795.3:c.3637A>G	p.Ser1213Gly	chr22:51159850A>G	De novo	M	ASD	The Autism Simplex Collection (TASC), Europe	NM_033517.1:c:3589A>G	p.Ser1197Gly	chr22:g.51159850A>G	Missense	NA	0	Uncertain significance	In silico predictions of pathogenicity disagree (Table S3)
69	Zhang (2015) PLoS One	26544041	ZXT	(c.3598G>C) m	(Ala1200Pro) m	chr22:51159901G>C d	De novo	M	Infantile spasms, ID	China	NM_033517.1:c.3640G>C	p.Ala1214Pro	chr22:g.51159901G>C	Missense	CM1512003	0	Uncertain significance	In silico predictions of pathogenicity disagree (Table S3)
70	Lim (2017) Nat Neurosci	28714951	G01-GEA-133-HI	NA	R1271G	22:51160024C>G	De novo	M	ASD	Autism Sequencing Consortium, Europe	NM_033517.1:c.3763C>G	p.Arg1255Gly	chr22:g.51160024C>G	Missense	NA	0 (22:51160024C>T (rs773082364) (p.Arg1255Trp) present 6 times)	Uncertain significance	In silico predictions of pathogenicity disagree, although the majority predict a neutral/likely benign effect (Table S3)
All genomic positions refer to human genome build GRCh37/hg19. Recurrent variants are indicated in bold.
ASD, autism spectrum disorder; F, female; ID, intellectual disability; M, male; NA, not available
a Variants were classified according to the American College of Medical Genetics and Genomics (ACMG) guidelines (PMID: 25741868).
b Patient also reported in Aldinger et al. (2013, PMID: 23225497) (subject LR09-290) and Yuen et al. (2017, PMID: 28263302) (subject 1-0007-003).
c This variant was originally reported as chr22:g.51,153,376G>A. The authors confirmed that this resulted from a typo and that the correct change is chr22:g.51,153,476G>A.
d Additional information provided by the authors.
e Patient also reported in Darville et al. (2016, PMID: 27333044) (Patient 1).
f These nucleotide and protein positions do not match; the authors confirmed that these annotations were mistaken and provided the genomic coordinates for reannotation.
g Patient also reported in ClinVar (Genome Clinic of Geneva, University Hospital of Geneva) (submission accession SCV000537723.1).
h Patient reported by the same group in Rossi et al. (2017, PMID: 28330790) and in ClinVar (Ambry Genetics) (submission accession SCV000244220.3).
i Patient also reported in ClinVar (GeneDx) (submission accession SCV000329516.4).
j Patient also reported in Retterer et al. (2016, PMID: 26633542) and ClinVar (GeneDx) (submission accession SCV000329517.4).
k Patient also reported in Darville et al. (2016, PMID: 27333044) (Patient 2).
l Patient also reported in ClinVar (HudsonAlpha Institute for Biotechnology) (submission accession SCV000265610.2).
m These nucleotide and protein positions do not match. The authors confirmed that these annotations were mistaken and provided the genomic coordinates for reannotation.

## Sheet: Table S2
Table S2. Clinical features of individuals with pathogenic or likely pathogenic SHANK3 variants reported in the literature.													Same subject					Same subject									Same subject
Publication	Durand (2007) Nat Genet		Moessner (2007) Am J Hum Genet	Gauthier (2009) Am J Med Genet B	Gauthier (2010) Proc Natl Acad Sci USA			Gauthier (2010) Proc Natl Acad Sci USA	Hamdan (2011) Am J Hum Genet	Gong (2012) PLoS One	Boccuto (2013) Eur J Hum Genet	Boccuto (2013) Eur J Hum Genet	Leblond (2014) PLoS Genet	Serret (2015) BMC Psychiatry	Leblond (2014) PLoS Genet	Leblond (2014) PLoS Genet	Leblond (2014) PLoS Genet	Leblond (2014) PLoS Genet	Serret (2015) BMC Psychiatry	Leblond (2014) PLoS Genet	Leblond (2014) PLoS Genet	Leblond (2014) PLoS Genet	Leblond (2014) PLoS Genet	De Rubeis (2014) Nature	O'Roak (2014) Nat Comm	Redin (2014) J Med Genet	Srivastava (2014) Ann Neurol	Farwell (2015) Genet Med	Srivastava (2014) Ann Neurol	Bramswig (2015) Hum Genet	Griswold (2015) Mol Autism	Hara (2015) Am J Med Genet A	Nemirovsky (2015) PLoS One			Yuen (2015) Nat Med	Fokstuen (2016) Hum Genomics	Lelieveld (2016) Nat Neurosci	Holder (2016) Epilepsia	Thevenon (2016) Clin Genet	Retterer (2016) Clin Genet	Retterer (2016) Clin Genet	Retterer (2016) Clin Genet	DDD Study (2017) Nature	DDD Study (2017) Nature	DDD Study (2017) Nature	Yuen (2017) Nat Neurosci	Yuen (2017) Nat Neurosci	Yuen (2017) Nat Neurosci
PMID	17173049		17999366	18615476	20385823			20385823	21376300	22509352	22892527	22892527	25188300	25947967	25188300	25188300	25188300	25188300	25947967	25188300	25188300	25188300	25188300	25363760	25418537	25167861	25131622	25356970	25131622	25724810	26185613	25931020	25646853			25621899	27353043	27479843	27554343	26757139	26633542	26633542	26633542	28135719	28135719	28135719	28263302	28263302	28263302
Individual	2 affected brothers (family ASD2): AU016_3	2 affected brothers (family ASD2): AU016_5	SK0007 (family ASD4)	NA	3 affected brothers: II-1	3 affected brothers: II-2	3 affected brothers: II-3	NA	Patient 6	NA	12718	CMS14055	AUN_003	Case 2	AUN_001	AU084_4	AU921_3	AUN_004	Case 1	AU285_4	AUN_005	AU380_3	AUN_002	8000110220	14470.p1	APN-122	25	NA	75	K2512	NA	NA	3 affected brothers: III-1	3 affected brothers: III-2	3 affected brothers: III-3	3-0107_00	NA	DNA1316441B	21	16	NA	NA	NA	DDD4K.03824	DDD4K.00977	DDD4K.03824	7-0123-003	1-0726-003	AU009805
Mutation a	p.Ala1227Glyfs*69	p.Ala1227Glyfs*69	p.Gln321Arg	p.Ser755Serfs*1	p.Arg1117*	p.Arg1117*	p.Arg1117*	p.Arg536Trp	c.601-1G>A	p.Tyr999*	p.Pro141Ala	p.Glu1295Argfs*91	p.Glu809*	p.Glu809*	p.Pro1005Argfs*73	p.Ala1076Glufs*218	p.Leu1142Valfs*153	p.Ser1202Cysfs*81	p.Ser1202Cysfs*81	p.Gln1243*	p.Arg1255Leufs*25	p.Gly1271Alafs*15	p.Gly1339Glufs*5	p.Cys524*	p.Ala1227Glyfs*69	p.Pro976Argfs*325	p.Ala1227Glyfs*69	p.Ala1227Glyfs*69	p.Arg1255Leufs*25	c.2265+1G>A	p.Gln1468*	p.Ala1034Profs*44	p.Ser1072Profs*6	p.Ser1072Profs*6	p.Ser1072Profs*6	p.Arg309Glyfs*21	p.His1213Profs*83	p.Ala1227Glyfs*69	c.2265 + 1G>A	p.Gln1445*	p.Arg1115*	p.Ala1227Glyfs*69	p.Gln1289Valfs*4	p.Arg1255Leufs*25	p.Arg1255Leufs*25	p.Arg1363Glnfs*31	c.2265+1G>A	p.Lys951Glnfs*345	p.Gln957Hisfs*121
Effect	Frameshift	Frameshift	Missense	Splice site (with functional frameshift confirmed)	Nonsense	Nonsense	Nonsense	Missense	Splice site	Nonsense	Missense	Frameshift	Nonsense	Nonsense	Frameshift	Frameshift	Frameshift	Frameshift	Frameshift	Nonsense	Frameshift	Frameshift	Frameshift	Nonsense	Frameshift	Frameshift	Frameshift	Frameshift	Frameshift	Splice site	Nonsense	Frameshift	Frameshift	Frameshift	Frameshift	Frameshift	Frameshift	Frameshift	Splice site	Nonsense	Nonsense	Frameshift	Frameshift	Frameshift	Frameshift	Frameshift	Splice site	Frameshift	Frameshift
Inheritance	De novo (germinal mosaicism)	De novo (germinal mosaicism)	De novo	De novo	De novo (germinal mosaicism)	De novo (germinal mosaicism)	De novo (germinal mosaicism)	De novo	De novo	De novo	De novo	Not maternal	De novo	De novo	Not maternal	De novo	De novo	De novo	De novo	De novo	De novo	De novo	Not maternal	NA	De novo	De novo	De novo	De novo	De novo	De novo	NA	De novo	De novo (germinal mosaicism)	De novo (germinal mosaicism)	De novo (germinal mosaicism)	De novo	NA	De novo	De novo	De novo	NA	NA	NA	De novo	De novo	De novo	De novo	NA	De novo (mosaic?)
General
Gender	Male	Male	Female	Male	Male	Male	Male	Female	Male	Male	Female	Male	Female	Female	Female	Male	Male	Male	Male	Male	Male	Male	Male	Male	Male	Female	NA [Male]	NA [Male]	NA [Male]	Male	NA	Female	Male	Male	Male	Male	NA	NA	Female	Male	NA	NA	NA	Female	Female	Male	Male b	NA	NA
Country of origin/background	France/Caucasian	France/Caucasian	Canada/Arabic European	Canada/Caucasian	Canada/Caucasian	Canada/Caucasian	Canada/Caucasian	Canada/Caucasian	Canada	Chinese	USA/African American	Italy/Caucasian	France/Caucasian b	France/Caucasian b	France	France/Caucasian b	France/Caucasian b	France/Caucasian b	France/Caucasian b	France/Caucasian b	France	France	France	Sweden	USA/Caucasian	France	USA	USA	USA	(patients from Germany, Turkey, Italy, Spain, Switzerland, Poland)	USA	Japan	Argentina	Argentina	Argentina	Canada	Switzerland	Netherlands	USA	France	USA	USA	USA	UK	UK	UK	Canada b	Canada	USA
Age of mother at birth (years)	26	31																							23					24
Age of father at birth (years)	22	27																							33					26
Gestational age (weeks)	Term	Term	38								Term																			40		39
Birth weight (g)	Average	3420									3061	3750																		3810 (+0.42 SD)		2860
Birth length (cm)	Average	50																												55 (+1.1 SD)		50
Birth OFC (cm)	Average	35.5																												36 (+0.3 SD)		33.5
Postnatal growth
Age at most recent assessment (years)	14	17						23	15		25	15		17					21						10		6		11	13 10/12		25							13	15
Height (cm)		175 (+0.4 SD)						Normal growth			>95P	3P													+0.84 SD					147 (−1.93 SD)		145 (−2.5 SD)
Weight (kg)											>95P	75P													+1.29 SD					33 (−2.52 SD)		26 (−3.4 SD)
OFC (cm)		55.5 (−0.8 SD)									>95P	75P									–2.5 SD				+3 SD					52 (−1.71 SD)		50 (−0.1 SD)
Psychomotor development
Sat/walked independently (months)	9/16	6/18		6/15							?/13-14	?/18		?/15					?/14							?/18				8/14		9/24	Mild delay in motor development
First words & current verbal ability	5 y; had fluent language with extensive vocabulary, some stereotyped sentences; regressed to having no functional language	36 mo; said a few word approximations but lost them, except mama and dada	Stopped using language at 2–2.5 y, regained some words at 3.5 y. Limited reciprocal conversation about narrow interests; verbal repetitive behaviors	12-13 mo (no information about current language)					Severe language impairment		36 mo; echolalia	No speech	Verbal	24 mo; short sentences, echolalia, stereotypic language	Non verbal		Non verbal	Verbal	39 mo; simple vocabulary, short sentences, echolalia, stereotypic language	Non verbal	Verbal		Non verbal		Regression, word loss, non verbal	36 mo; speech regression				No speech; echolalia		36 mo; no speech after regression at 4 y 6 mo	No speech	Language regression, no speech	Language regression, no speech		Mutism			No speech
DD/ID (IQ)	ID	Severe ID	ID		Borderline ID (WAIS VIQ 73, NVIQ 73, FSIQ 72)	Mild ID (no IQ)	Moderate ID (IQ 36)	Borderline ID (IQ 73)	Mild ID	ID	ID	Severe ID	Global DD, severe ID	Severe ID	Global DD, severe ID	Moderate ID	Global DD, severe ID	Global DD, moderate ID	Severe ID	Global DD, severe ID	Global DD, moderate ID	Severe ID	Global DD, severe ID		Severe ID (NVIQ 27, VIQ 13)	Severe ID			ID	ID			Severe ID	Severe ID	Severe ID		ID	ID		Severe ID				ID	ID	ID
Feeding problems	−	+									−										+									+			+
Hypotonia	+												+		+		+	−		+	+		+							−			+	−	−
Behavioral abnormalities
ASD	Autism	Autism	Autism	Autism	− (No evidence of autistic features)			− (No evidence of autistic features)	− (Assessed for autism: negative)		Autism	PDD-NOS	Autism	ASD	Autism	Autism	Autism	Autism	ASD	Autism	Autism	Autism	Autism	ASD	ASD	Autistic traits	ASD		ASD	Autism	Autism	Autistic behavior	Autism spectrum features	Autism spectrum features	Autism spectrum features	ASD				ASD							ASD	ASD	ASD
Hyperactivity	−	+				+						Restless								+										+				Agitation	Agitation
Sleep disturbance	+		+																							+				+		+
Other behavioral abnormalities	Regression at age 20 y, with severe outbursts, loss of skills and sphincter control, weight loss	Regression at age 16 y, with loss of autonomy and sphincter control, dysphagia, weight loss	Severe inattention and irritability, treated successfully with methylphenidate and atomoxetine; mild self-injurious behaviors (biting and hair pulling)		Schizophrenia (onset 19 y)	Schizophrenia (diagnosed at 21 y)	Schizophrenia and atypical chronic psychosis (diagnosed at 16 y)	Schizoaffective disorder (onset 11 y)				Aggressive	Early regression	Behavioral regression at 12 y with sleep disturbances, atypical bipolar and catatonia	Early regression		Early regression; severe stereotypies	Early regression	Behavioral regression at 13 y with sleep disturbances, atypical bipolar and catatonia				Late regression; chewing of non-food items			Attention deficit, behavioral disorders	Developmental regression		Developmental regression			Verbal and motor regression, with loss of purposeful hand movements and ability to walk, at 4 y 6 mo; Rett-like phenotype with stereotyped hand movements such as wringing and breath-holding spells		Normal development during the first 2 y, followed by progressive deterioration evolving to an almost complete absence of verbal communication	Normal development during the first 2 y, followed by progressive deterioration evolving to an almost complete absence of verbal communication		Psychotic symptoms
Neurological findings
Brain imaging			Normal CT scan (Moessner 2007); normal MRI at 14 y (Aldinger 2013)						Normal CT scan																					Normal MRI		Normal MRI	Normal MRI	Normal MRI	Normal MRI				Left sylvian fissure arachnoid cyst
Seizures (type, age onset)	+ (Generalized tonic/clonic seizures, 20 y)	+ (Generalized tonic/clonic seizures, 17 y)	−		−	+ (1 seizure at 10 y)	−	−	−	+	+	+ (10 mo)	−	−	−	−	+ (Generalized tonic/clonic seizures, 10 y; intolerance and resistance to several anticonvulsants)	−	−	−	+ (Absence seizures, age onset unknown)	−	+ (Generalized tonic/clonic seizures, 8 y, resistant to treatment)		+	−				+ (12 y)		+ (Tonic movements of upper limbs; 3 y 8 mo)	+ (Atonic seizures, not responsive to classical antiepileptic drugs; 6 y)	+ (Frequent atonic and generalized seizures refractory to medical treatment, 7 y)	+ (Frequent atonic and generalized seizures refractory to medical treatment, 7 y)				−	+
EEG abnormalities			Abnormal EEG, with bilateral epileptiform discharges																							Abnormal without epilepsy				Abnormal (spike waves and sharp waves)		Right frontal spike discharge (5 y)		Some EEGs showed right-temporal discharges	Some EEGs showed right-temporal discharges				−
Dysmorphic features	No dysmorphic features	No dysmorphic features	No dysmorphic features		No dysmorphic features	No dysmorphic features	No dysmorphic features	No dysmorphic features										No dysmorphic features																						Facial dysmorphism
Synophrys																														Synophrys and thick eyebrows
Long eyelashes															+		+			+			+							+
Periorbital fullness																	+			+										−
Deep set eyes																	+			+			+
Epicanthal folds											+																			−
Wide nasal bridge															+		+			+	+									−				Broad nasal bridge	Broad nasal bridge
Bulbous nose													+				+				+					+				−				Bulbous nasal root	Bulbous nasal root
Full cheeks																														−
Flat midface																	+
Large mouth																														+				+	+
Full lips																				+										Thick lower vermillion
Abnormal philtrum												Short philtrum			Smooth philtrum								Smooth philtrum			Short philtrum				Short philtrum
Malocclusion/widely spaced teeth																				Dental malocclusion
High arched palate																	+
Abnormal ears											Thickened helices and fleshy lobes	Coarse	Large prominent ears		Large ears		Large ears			Large ears	Large ears									−
Prominent jaw											−	+											+
Pointed chin													+				+
Other craniofacial features											Anteverted nares	Long nasal septum	Retrognathia										Long face			Abnormal eyebrows				Low frontal hairline, coarse face, macroglossia
Large fleshy hands																					Fleshy hands									−
5th finger clinodactyly
Hypoplasia of distal phalanges V																														Hands with generally short distal phalanges
Syndactyly of toes 2-3																														−
Hypertrichosis																														+
Abnormal hair whorl
Hypoplastic/dysplastic toenails																							+							Hypoplasia of fifth toenail
Hyperextensibility
Sacral dimple
Scoliosis																	+													−		+
Other features
Gastroesophageal reflux																				+	+		+
Increased pain tolerance																																+
Decreased perspiration/heat intolerance
Frequent infections											−																			+
Vision problems	−	Strabismus									−									Strabismus					−					Strabismus convergens, hypermetropia
Other			Conceived by in vitro fertilization; parents are first cousins. Patient also reported in Aldinger et al. (2013, PMID: 23225497) (subject LR09-290) and Yuen et al. (2017, PMID: 28263302) (subject 1-0007-003)								Apneic episode at 3 mo of age		Cholesteatoma	Same patient published in Leblond et al. (2014) (AUN_003). Patient also described in Darville et al. (2016, PMID: 27333044) (Patient 1)	Cycling vomiting			Migraines	Same patient published in Leblond et al. (2014) (AUN_004)				Ataxia and dysmetria	Autism Sequencing Consortium; mutation validated in the proband, no parent DNA available		Distal spasticity	Patient seen at Child neurology, Kennedy Krieger Institute, Baltimore. This patient is described in this manuscript (S8)	Patient referred to Ambry Genetics for genetic testing. Same patient reported by Srivastava et al. (2014) (subject 25). Patient also reported in another paper from Ambry Genetics: Rossi et al. (2017, PMID: 28330790)	Patient seen at Child neurology, Kennedy Krieger Institute, Baltimore. Patient also reported in Retterer et al. (2015, PMID: 26633542) and ClinVar (GeneDx) (submission accession SCV000329517.4). This patient is described in this manuscript (S9)	Hoarse voice. Before the genetic diagnosis, some of the patient's features were thought to be suggestive of the Coffin-Siris syndrome/Nicolaides-Baraitser syndrome spectrum, such as the hypoplastic fifth toenails. After the genetic diagnosis, the mild facial dysmorphisms were interpreted as familial variability.		Delayed menarche, at 18 y				Multiplex family with 2 ASD affected siblings; the SHANK3 mutation was present in only one of the sibs	Patient also reported in ClinVar (Genome Clinic of Geneva, University Hospital of Geneva) (submission accession SCV000537723.1)					Patient also reported in ClinVar (GeneDx) (submission accession SCV000329516.4). This patient is described in this manuscript (S7)
This table includes all published individuals with pathogenic or likely pathogenic SHANK3 variants. Individuals reported only in ClinVar (whose variants are listed in Table S1) were not included here because ClinVar typically includes no phenotype information.
The presence (+) or absence (−) of each feature is reported for each individual. ASD, autism spectrum disorder; CT scan, computed-tomography scan; DD, developmental delay; EEG, electroencephalography; FSIQ, full scale intelligence quotient; ID, intellectual disability; MRI, magnetic resonance imaging; NA, not available; NVIQ, non verbal intelligence quotient; OFC, occipitofrontal circumference; P…
a RefSeq NM_033517.1 and NP_277052.1. See Table S1 for complete annotation of variants.
b Additional information provided by the authors.
[truncated: 3 more columns]

## Sheet: Table S3
Table S3. In silico prediction of pathogenicity of missense variants in SHANK3 identified in this study and in the literature.
Study	PMID	Information reported in the original paper						Information reannotated			rs number	HGMD ID	Missense deleteriousness prediction																					Frequency in gnomAD	Functional characterization	Listed in other tables in this manuscript
													Grantham score a	GERP++ b	ConSurf c	SIFT d			PANTHER f		Polyphen-2 g		SNP&GO h		MutPred2 i	PROVEAN j		Condel 2 k		CADD		M-CAP m
		Patient ID	cDNA change	Protein change	Genomic change	Inheritance	Sex	cDNA change	Protein change	Genomic change						Reannotation e	Score	Prediction	Preservation time	Prediction	Score	Prediction	Probability	Prediction		Score	Prediction	Score	Prediction	Raw score	PHRED-like scaled C-score l	Score	Prediction
Boccuto (2013) Eur J Hum Genet	22892527	12718	NM_001080420.1:c.421C>G	p.Pro141Ala	NA	De novo	F	NM_033517.1:c.421C>G	p.Pro141Ala	chr22:g.51117094C>G	rs397514705	CM131283	27	4.83	9 (e ,f)	p.Pro141Ala	0.047	Damaging	1237	Probably damaging	0.999	Probably damaging	0.422	Neutral	0.54	-5.94	Deleterious	0.524678	Deleterious	5.43846	26.1	0.04	Possibly Pathogenic	0		Tables S1, S2
Moessner (2007) Am J Hum Genet	17999366	SK0007 (family ASD4)	NM_033517.1:c.962A>G	p.Q321R	NA	De novo	F	NM_033517.1:c.962A>G	p.Gln321Arg	chr22:g.51121844A>G		CM075006	43	4.8	8 (e, f)	p.Gln321Arg	0.003	Damaging	797	Probably damaging	0.99	Probably damaging	0.815	Disease	0.609	-3.05	Deleterious	0.473114	Neutral	5.74329	26.9	0.025	Likely Benign	0	+ (Arons [2012] J Neurosci; Durand [2012] Mol Psychiatry); – (Mameza [2013] J Biol Chem)	Tables S1, S2
Bowling (2017) Genome Med	28554332	00263-C	NM_033517.1:c.1010C>G	p.Thr337Ser	NA	De novo	NA	NM_033517.1:c.1010C>G	p.Thr337Ser	chr22:g.51123059C>G		NA	58	2.88	5 (e)	p.Thr337Ser	0.318	Tolerated	797	Probably damaging	0.18	Benign	0.026	Neutral	0.103	-1.57	Neutral	0.390777	Neutral	2.77772	21.2	0.006	Likely Benign	0		Table S1 (variant of uncertain significance)
Gauthier (2010) Proc Natl Acad Sci USA	20385823	NA	NA	R536W	NA	De novo	F	NM_033517.1:c.1606C>T	p.Arg536Trp	chr22:g.51137225C>T	rs387906933	CM102471	101	-0.987	5 (e)	p.Arg552Trp	0.001	Damaging	797	Probably damaging	0.776	Possibly damaging	0.364	Neutral	0.326	-6.01	Deleterious	0.44793	Neutral	5.14484	25.4	0.053	Possibly Pathogenic	0	Partial rescue of shank3 knockdown phenotypes (morphological and swimming defects) in zebrafish embryos (Gauthier [2010] Proc Natl Acad Sci USA)	Tables S1, S2
O'Roak (2014) Nat Comm	25418537	217-14410-5190	ENST00000262795.3:c.3637A>G	p.Ser1213Gly	chr22:51159850A>G	De novo	M	NM_033517.1:c.3589A>G	p.Ser1197Gly	chr22:g.51159850A>G		NA	56	4.58	5 (b)	p.Ser1213Gly	0.056	Tolerated	797	Probably damaging	0.956	Probably damaging	0.105	Neutral	0.125	-2.93	Deleterious	0.517984	Neutral	3.43585	23	0.031	Possibly Pathogenic	0		Table S1 (variant of uncertain significance)
Zhang (2015) PLoS One	26544041	ZXT	(c.3598G>C) n	(Ala1200Pro) n	NA	De novo	M	NM_033517.1:c.3640G>C	p.Ala1214Pro	chr22:g.51159901G>C		CM1512003	27	4.58	6 (b)	p.Ala1230Pro	0.016	Damaging	797	Probably damaging	0.9	Possibly damaging	0.315	Neutral	0.491	-2.81	Deleterious	0.364525	Neutral	4.47764	24.2	0.016	Likely Benign	0		Table S1 (variant of uncertain significance)
Lim (2017) Nat Neurosci	28714951	G01-GEA-133-HI	NA	R1271G	22:51160024C>G	De novo	M	NM_033517.1:c.3763C>G	p.Arg1255Gly	chr22:g.51160024C>G		NA	125	2.34	1 (e)	p.Arg1271Gly	0.298	Tolerated	797	Probably damaging	0.366	Benign	0.065	Neutral	0.123	-3.49	Deleterious	0.437822	Neutral	1.1624	11.55	0.013	Likely Benign	0		Table S1 (variant of uncertain significance)
This study o		S13	NM_033517.1:c.3872C>T	p.Ser1291Leu	chr22:g.51160133C>T	Not maternal (variant also present in unaffected sibling)	M	NM_033517.1:c.3872C>T	p.Ser1291Leu	chr22:g.51160133C>T	rs773196497		145	4.8	8 (e, f)	p.Ser1307Leu	0.004	Damaging	797	Probably damaging	0.988	Probably damaging	0.085	Neutral	0.087	-4.00	Deleterious	0.412241	Neutral	5.96693	27.7	0.169	Possibly Pathogenic	0.00001658 (4/241280)		Table 1
This study		S14	NM_033517.1:c.5014G>T	p.Asp1672Tyr	chr22:g.51169558G>T	De novo	M	NM_033517.1:c.5014G>T	p.Asp1672Tyr	chr22:g.51169558G>T			160	3.86	9 (e, f)	p.Asp1688Tyr	0.001	Damaging	797	Probably damaging	1	Probably damaging	0.573	Disease	0.705	-7.17	Deleterious	0.683146	Deleterious	6.75285	32	0.55	Possibly Pathogenic	0		Table 1
All genomic positions refer to human genome build GRCh37/hg19.
F, female; M, male; NA, not available
a The Grantham score measures the degree of amino acid substitution; closely similar pairs have scores <60, strongly dissimilar pairs have scores >100.
b GERP positive scores represent a substitution deficit and thus indicate that a site may be under evolutionary constraint. Scores range from 6.18 to –12.36; scores >2 indicate likely truly constrained sites.
c ConSurf calculates the evolutionary conservation of amino acid positions; the conservation scores range from 1 to 9, with 9 corresponding to highly conserved residues. Residue position and function scores are indicated in parentheses: e, exposed residue; b, buried residue; f, functional residue (highly conserved and exposed); s, structural residue (highly conserved and buried).
d The SIFT score ranges from 0 to 1. The amino acid substitution is predicted damaging if the score is ≤0.05, and tolerated if the score is >0.05.
e SIFT did not accept the correct reference sequence, ENSP00000490818 (corresponding to NP_277052.1/Q9BYB0-1) as input. We therefore reannotated the amino acid substitutions on ENSP00000442518.
f PANTHER-PSEP estimates the likelihood that a coding variant will cause a functional impact on the protein based on evolutionary preservation. The PSEP score is the time of preservation (in millions of years), and distinguishes probably damaging (>450) from possibly damaging and probably benign variants.
g Polyphen-2 score corresponds to the probability of the substitution being damaging. The score and prediction shown are based on the HumVar model.
h SNP&GO classifies amino acid substitutions as disease-related or neutral based on information derived from protein sequence, evolutionary conservation, and function.
i The MutPred2 score is the probability that the amino acid substitution is pathogenic, based on protein structure/function and evolutionary conservation. Substitutions are classified as disease-associated (p >0.5) or neutral (p <0.5).
j PROVEAN predicts whether an amino acid substitution affects protein function, classifying variants as deleterious or neutral. Predictions based on ENSP00000442518 (see column SIFT/Reannotation).
k Condel 2.0 classifies missense variants as deleterious or neutral, with a score ranging from 0 to 1; based on the weighted average of the normalized scores of five prediction methods. Predictions based on ENSP00000442518 (see column SIFT/Reannotation).
l The PHRED-like scaled C-score ranks a variant relative to all possible substitutions of the human genome. A scaled C-score ≥20 indicates that a variant is predicted to be among the 1% most deleterious possible substitutions in the human genome; a score ≥23 indicates the 0.5% most deleterious.
m The M-CAP (Mendelian Clinically Applicable Pathogenicity) score combines 9 previous pathogenicity scores (including SIFT, Polyphen-2 and CADD) and 7 conservation metrics (including GERP) with novel features to predict pathogenicity.
n These nucleotide and protein positions do not match. The authors confirmed that these annotations were mistaken and provided the genomic coordinates for reannotation.
o Individual S13 harbors a nonsense variant as well as this missense variant.

## Sheet: Table S4
Table S4. Reported truncating and in-frame variants in SHANK3 unlikely to be pathogenic
		Information reported in the original paper/database								Information reannotated
Study	PMID	Coding DNA change	Protein change	Genomic change	Annotation	Subject ID	Sex	Inheritance	Diagnosis	Coding DNA change	Protein change	Genomic change	Effect	HGMD ID	rs number	Frequency in gnomAD	Notes/warnings in gnomAD	AB median in gnomAD
Reported as loss of function
gnomAD a	NA	c.339+1G>C	NA	22:51115122G>C	Splice donor	NA	NA	NA		NG_008607.2(NM_033517.1):c.339+1G>C	p.?	chr22:g.51115122G>C	Splice-site		rs777242888	1/243286 (4.11e-6)		0.305556
gnomAD	NA	c.733_734insCC	p.Ile245ThrfsTer136	22:51117579A>ACC	Frameshift	NA	NA	NA		NM_033517.1:c.733_734insCC	p.Ile245Thrfs*136	chr22:g.51117579_51117580insCC	Frameshift			1/30874 (3.239e-5)	Warning! This variant is only covered in 15437 individuals (adjusted allele number = 30874). This means that the site is covered in fewer than 80% of the individuals in ExAC, which may indicate a low-quality site.	0.607143
Kolevzon (2011) Brain Res b	21062623	[c.1339_1340dupG]	[codon 447]	NA	[Frameshift] Intronic	NA (Present in 1 patient and 4 of 382 controls)	M	Maternally inherited (mother healthy)	Autism, ID			chr22:g.51135705dupG	Intronic		rs745950788	173/30836 (0.005610)	Note: This variant is multiallelic! Warning! This variant is only covered in 1705 individuals (adjusted allele number = 3410). This means that the site is covered in fewer than 80% of the individuals in ExAC, which may indicate a low-quality site.
Boccuto (2013) Eur J Med Genet	22892527	NM_001080420.1:c.1339_1340insG	p.Ala447fsX503	NA	Frameshift	17160	F	Paternally inherited (father has learning problems and attention deficit disorder)	ASD			chr22:g.51135705dupG	Intronic	CI131286 (classified as damaging)	rs745950788	173/30836 (0.005610)	Note: This variant is multiallelic! Warning! This variant is only covered in 1705 individuals (adjusted allele number = 3410). This means that the site is covered in fewer than 80% of the individuals in ExAC, which may indicate a low-quality site.
gnomAD	NA	c.1339dupG	p.Ala447GlyfsTer57	22:51135697T>TG	Frameshift	NA	NA	NA				chr22:g.51135705dupG	Intronic		rs745950788	173/30836 (0.005610)	Note: This variant is multiallelic! Warning! This variant is only covered in 1705 individuals (adjusted allele number = 3410). This means that the site is covered in fewer than 80% of the individuals in ExAC, which may indicate a low-quality site.
gnomAD	NA	c.1339delG	p.Ala447ArgfsTer49	22:51135697TG>T	Frameshift	NA	NA	NA				chr22:g.51135705delG	Intronic		rs745950788	8/3410 (0.002346)	Note: This variant is multiallelic! Warning! This variant is only covered in 1705 individuals (adjusted allele number = 3410). This means that the site is covered in fewer than 80% of the individuals in ExAC, which may indicate a low-quality site.
gnomAD	NA	c.1353+1G>A	NA	22:51135720G>A	Splice donor	NA	NA	NA				chr22:g.51135720G>A	Intronic		rs753943085	1/30566 (3.272e-5)	Warning! This variant is only covered in 15283 individuals (adjusted allele number = 30566). This means that the site is covered in fewer than 80% of the individuals in ExAC, which may indicate a low-quality site.
gnomAD	NA	c.1353+1G>C	NA	22:51135720G>C	Splice donor	NA	NA	NA				chr22:g.51135720G>C	Intronic		rs753943085	1/3584 (0.0002790)	Warning! This variant is only covered in 1792 individuals (adjusted allele number = 3584). This means that the site is covered in fewer than 80% of the individuals in ExAC, which may indicate a low-quality site.
gnomAD	NA	c.1362_1363insTGCCCGCTGCC	p.Pro455CysfsTer45	22:51135959G>GTGCCCGCTGCC	Frameshift	NA	NA	NA				chr22:g.51135959_51135960insTGCCCGCTGCC	Intronic			17/21038 (0.0008081)	Warning! This variant is only covered in 10519 individuals (adjusted allele number = 21038). This means that the site is covered in fewer than 80% of the individuals in ExAC, which may indicate a low-quality site.
gnomAD	NA	c.1371_1372insGCAGCCCCGCGGCCCCGGAGCCCTGAGCGGGCGCGGCTCGTGCGCTGGCGGGAGCGGGCCGCGCGCCA	p.Cys458AlafsTer61	22:51135968C>CGCAGCCCCGCGGCCCCGGAGCCCTGAGCGGGCGCGGCTCGTGCGCTGGCGGGAGCGGGCCGCGCGCCA	Frameshift	NA	NA	NA				chr22:g.51135968_51135969insGCAGCCCCGCGGCCCCGGAGCCCTGAGCGGGCGCGGCTCGTGCGCTGGCGGGAGCGGGCCGCGCGCCA	Intronic			6/3924 (0.001529); 3 homozygotes	Note: This variant is multiallelic! Warning! This variant is only covered in 1962 individuals (adjusted allele number = 3924). This means that the site is covered in fewer than 80% of the individuals in ExAC, which may indicate a low-quality site.
gnomAD	NA	c.1371_1372insGCAGCCCCGCGGCCCCGGAGCCCTGAGCGGGCGCGGCTCGTGCGCTGGCGGGAGCGGGCCGGGCGCGGCGGCACGGCCCA	p.Cys458AlafsTer65	22:51135968C>CGCAGCCCCGCGGCCCCGGAGCCCTGAGCGGGCGCGGCTCGTGCGCTGGCGGGAGCGGGCCGGGCGCGGCGGCACGGCCCA	Frameshift	NA	NA	NA				chr22:g.51135968_51135969insGCAGCCCCGCGGCCCCGGAGCCCTGAGCGGGCGCGGCTCGTGCGCTGGCGGGAGCGGGCCGGGCGCGGCGGCACGGCCCA	Intronic			4/3924 (0.001019); 2 homozygotes	Note: This variant is multiallelic! Warning! This variant is only covered in 1962 individuals (adjusted allele number = 3924). This means that the site is covered in fewer than 80% of the individuals in ExAC, which may indicate a low-quality site.
gnomAD	NA	c.1372_1387delTGTATTCGAATTCGAG	p.Cys458LeufsTer33	22:51135968CTGTATTCGAATTCGAG>C	Frameshift	NA	NA	NA				chr22:g.51135969_51135984delTGTATTCGAATTCGAG	Intronic			5/3924 (0.001274)	Note: This variant is multiallelic! Warning! This variant is only covered in 1962 individuals (adjusted allele number = 3924). This means that the site is covered in fewer than 80% of the individuals in ExAC, which may indicate a low-quality site.
gnomAD	NA	c.1372_1373insAC	p.Cys458TyrfsTer39	22:51135969T>TAC	Frameshift	NA	NA	NA				chr22:g.51135969_51135970insAC	Intronic			15/178 (0.08427)	Warning! This variant is only covered in 89 individuals (adjusted allele number = 178). This means that the site is covered in fewer than 80% of the individuals in ExAC, which may indicate a low-quality site.
gnomAD	NA	c.1375_1376insGCGGGCGCGG	p.Ile459SerfsTer48	22:51135972A>AGCGGGCGCGG	Frameshift	NA	NA	NA				chr22:g.51135972_51135973insGCGGGCGCGG	Intronic			8/42 (0.1905); 4 homozygotes	Note: This variant is multiallelic! Warning! This variant is only covered in 21 individuals (adjusted allele number = 42). This means that the site is covered in fewer than 80% of the individuals in ExAC, which may indicate a low-quality site.
gnomAD	NA	c.1388_1389insGGGCCCGGCGGCCCCGGCCCCGCGCCCGGCC	p.Arg464GlyfsTer50	22:51135984G>GCGGGCCCGGCGGCCCCGGCCCCGCGCCCGGC	Frameshift	NA	NA	NA				c	(normal sequence?)			14/44 (0.3182); 5 homozygotes	Note: This variant is multiallelic! Warning! This variant is only covered in 22 individuals (adjusted allele number = 44). This means that the site is covered in fewer than 80% of the individuals in ExAC, which may indicate a low-quality site.
gnomAD	NA	c.1414_1415insGGGCG	p.Pro472ArgfsTer26	22:51136011C>CGGGCG	Frameshift	NA	NA	NA		NM_033517.1:c.1366_1367insGGGCG	p.Pro456Argfs*26	chr22:g.51136011_51136012insGGGCG	Frameshift			1/24648 (4.057e-5)	Warning! This variant is only covered in 12324 individuals (adjusted allele number = 24648). This means that the site is covered in fewer than 80% of the individuals in ExAC, which may indicate a low-quality site.	0.625
gnomAD	NA	c.1436_1437insAT	p.Lys480Ter	22:51136033C>CAT	Nonsense	NA	NA	NA		NM_033517.1:c.1388_1389insAT	p.Lys464*	chr22:g.51136033_51136034insAT	Nonsense			1/510 (0.001961)	Warning! This variant is only covered in 255 individuals (adjusted allele number = 510). This means that the site is covered in fewer than 80% of the individuals in ExAC, which may indicate a low-quality site.	0.416667
gnomAD	NA	c.1487delA	p.Lys496ArgfsTer19	22:51136082GA>G	Frameshift	NA	NA	NA		NM_033517.1:c.1439delA	p.Lys480Argfs*19	chr22:g.51136084delA	Frameshift			1/83010 (1.205e-5)	Warning! This variant is only covered in 41505 individuals (adjusted allele number = 83010). This means that the site is covered in fewer than 80% of the individuals in ExAC, which may indicate a low-quality site.	0.35
gnomAD	NA	c.1563_1588dupGGGCGGTTTCTGGGAGGGAACCGTGA	p.Lys530ArgfsTer9	22:51137131G>GGAGGGCGGTTTCTGGGAGGGAACCGT	Frameshift	NA	NA	NA		NM_033517.1:c.1515_1540dupGGGCGGTTTCTGGGAGGGAACCGTGA	p.Lys514Argfs*9	chr22:g.51137134_51137159dupGGGCGGTTTCTGGGAGGGAACCGTGA	Frameshift		rs760340562	1/244608 (4.088e-6)		0.419355
Boccuto (2013) Eur J Med Genet	22892527	NM_001080420.1:c.1820-4G>A	NA	NA	Affects splice acceptor site (according to Splice Site Calculator)	CMS14218	F	Maternally inherited	Asperger	NG_008607.2(NM_033517.1):c.1772-4G>A	NA	chr22:g.51143162G>A	Intronic (splice region)	CS131284 (classified as damaging)	rs201424967	7/30886 (0.0002266)
gnomAD	NA	c.1940_1941insG	p.Ile647MetfsTer69	22:51143286T>TG	Frameshift	NA	NA	NA		NM_033517.1:c.1892_1893insG	p.Ile631Metfs*69	chr22:g.51143286_51143287insG	Frameshift			1/30904 (3.236e-5)	Warning! This variant is only covered in 15452 individuals (adjusted allele number = 30904). This means that the site is covered in fewer than 80% of the individuals in ExAC, which may indicate a low-quality site.	0.380952
gnomAD	NA	c.1942_1943insC	p.Glu648AlafsTer68	22:51143288G>GC	Frameshift	NA	NA	NA		NM_033517.1:c.1894_1895insC	p.Glu632Alafs*68	chr22:g.51143288_51143289insC	Frameshift			1/30926 (3.234e-5)	Warning! This variant is only covered in 15463 individuals (adjusted allele number = 30926). This means that the site is covered in fewer than 80% of the individuals in ExAC, which may indicate a low-quality site.	0.409091
gnomAD	NA	c.1944_1944+1delGG	NA	22:51143289AGG>A	Splice donor	NA	NA	NA		NG_008607.2(NM_033517.1):c.1896_1896+1delGG	p.?	chr22:g.51143290_51143291delGG	Splice-site			1/30876 (3.239e-5)	Warning! This variant is only covered in 15438 individuals (adjusted allele number = 30876). This means that the site is covered in fewer than 80% of the individuals in ExAC, which may indicate a low-quality site.	0.434783
gnomAD	NA	c.2140G>T	p.Glu714Ter d	22:51153244G>T	Nonsense	NA	NA	NA				chr22:g.51153244G>T	Intronic		rs749470920	1/30906 (3.236e-5)	LoF in a non-canonical transcript. Note: This variant is multiallelic! Warning! This variant is only covered in 15453 individuals (adjusted allele number = 30906). This means that the site is covered in fewer than 80% of the individuals in ExAC, which may indicate a low-quality site.
gnomAD	NA	c.4567C>T	p.Arg1523Ter d	22:51162559C>T	Nonsense	NA	NA	NA				chr22:g.51162559C>T	Intronic		rs771745090	4/123240 (3.246e-5)	LoF in a non-canonical transcript.
gnomAD	NA	c.4589+1G>A d	NA	22:51162582G>A	Splice donor	NA	NA	NA				chr22:g.51162582G>A	Intronic			1/123210 (8.116e-6)	LoF in a non-canonical transcript.
gnomAD	NA	c.5233_5243delGACGGCAGCTG	p.Asp1745Thr	22:51169720AGGCAGCTGGAC>A	Frameshift	NA	NA	NA		NM_033517.1:c.5185_5195delGACGGCAGCTG	p.Asp1729Thrfs*106	chr22:g.51169729_51169739delGACGGCAGCTG	Frameshift			1/112002 (8.928e-6)	Low confidence (end truncating)	0.368421
Reported as in-frame
gnomAD	NA	c.1356_1358delTGG	p.Gly453del	22:51135952CTGG>C	In-frame deletion	NA	NA	NA				chr22:g.51135953_51135955delTGG	Intronic			9/24072 (0.0003739)	Note: This variant is multiallelic! Warning! This variant is only covered in 12036 individuals (adjusted allele number = 24072). This means that the site is covered in fewer than 80% of the individuals in ExAC, which may indicate a low-quality site.
gnomAD	NA	c.1372_1383delTGTATTCGAATT	p.Cys458_Ile461del	22:51135968CTGTATTCGAATT>C	In-frame deletion	NA	NA	NA				chr22:g.51135969_51135980delTGTATTCGAATT	Intronic			1/3924 (0.0002548)	Note: This variant is multiallelic! Warning! This variant is only covered in 1962 individuals (adjusted allele number = 3924). This means that the site is covered in fewer than 80% of the individuals in ExAC, which may indicate a low-quality site.
gnomAD	NA	c.1380_1382delAAT	p.Ile461del	22:51135976GAAT>G	In-frame deletion	NA	NA	NA				chr22:g.51135977_51135979delAAT	Intronic			11/58 (0.1897); 2 homozygotes	Note: This variant is multiallelic! Warning! This variant is only covered in 29 individuals (adjusted allele number = 58). This means that the site is covered in fewer than 80% of the individuals in ExAC, which may indicate a low-quality site.
Leblond (2014) PLoS Genet	25188300	NA	p.P442-A445del	g.51135995-51136006delCCCGGCCCCGCG	In-frame deletion	NA	NA	Inherited	ASD	NM_033517.1:c.1334_1345delCGCCCGGCCCCG	p.Ala445_Pro448del	e	In-frame deletion			e
Waga (2011) Psychiatr Genet	21378602	c.1320-1338 del	p.440-446 del GPGPAP	NA	In-frame deletion	NA	M	Maternally inherited (mother had speech delay but no communication or social problems)	ASD, severe ID	NM_033517.1:c.1339_1356delGGCCCCGGCCCCGCGCCC	p.Gly447_Pro452del	e	In-frame deletion			e
gnomAD	NA	c.1432_1433insCGCGGCGGCACG	p.Arg477_Gly478insAl...	22:51136028G>GGCGCGGCGGCAC	In-frame insertion	NA	NA	NA		NM_033517.1:n.1384_1385insCGCGGCGGCACG	p.Arg461_Gly462insAlaArgArgHis	chr22:g.51136029_51136030insCGCGGCGGCACG	In-frame insertion			1/452 (0.002212)	Warning! This variant is only covered in 226 individuals (adjusted allele number = 452). This means that the site is covered in fewer than 80% of the individuals in ExAC, which may indicate a low-quality site.
gnomAD	NA	c.2169_2171delGAG	p.Arg725del	22:51150051CGGA>C	In-frame deletion	NA	NA	NA		NM_033517.1:n.2121_2123delGAG	p.Arg709del	chr22:g.51150053_51150055delGAG	In-frame deletion		rs764457752	1/243494 (4.107e-6)	Note: This variant is multiallelic!
gnomAD	NA	c.2245_2250dupGCAGAC	p.Ala749_Asp750dup	22:51153399T>TCGCAGA	In-frame insertion	NA	NA	NA		NM_033517.1:c.2197_2202dupGCAGAC	p.Ala733_Asp734dup	chr22:g.51153407_51153412dupGCAGAC	In-frame insertion			1/187532 (5.332e-6)
gnomAD	NA	c.2645_2674dupGCGCTGCCGGCCTGTACGAGCCGGGCGCGG	p.Gly882_Ala891dup	22:51158849T>TGGGCGCGGGCGCTGCCGGCCTGTACGAGCC	In-frame insertion	NA	NA	NA		NM_033517.1:c.2597_2626dupGCGCTGCCGGCCTGTACGAGCCGGGCGCGG	p.Gly866_Ala875dup	chr22:g.51158858_51158887dupGGGCGCGGGCGCTGCCGGCCTGTACGAGCC	In-frame insertion			2/24928 (8.023e-5)	Warning! This variant is only covered in 12464 individuals (adjusted allele number = 24928). This means that the site is covered in fewer than 80% of the individuals in ExAC, which may indicate a low-quality site.
gnomAD	NA	c.2954_2956delTGG	p.Leu985_Ala986delin...	22:51159166CTGG>C	In-frame deletion	NA	NA	NA		NM_033517.1:c.2906_2908delTGG	p.Leu969_Ala970delinsPro	chr22:g.51159167_51159169delTGG	In-frame deletion			1/58936 (1.697e-5)	Warning! This variant is only covered in 29468 individuals (adjusted allele number = 58936). This means that the site is covered in fewer than 80% of the individuals in ExAC, which may indicate a low-quality site.
gnomAD	NA	c.3622_3624delAAG	p.Lys1208del	22:51159831CAAG>C	In-frame deletion	NA	NA	NA		NM_033517.1:c.3574_3576delAAG	p.Lys1192del	chr22:g.51159835_51159837delAAG	In-frame deletion		rs778564752	1/242592 (4.122e-6)	Note: This variant is multiallelic!
gnomAD	NA	c.3736_3738delGAG	p.Glu1246del	22:51159945AGAG>A	In-frame deletion	NA	NA	NA		NM_033517.1:c.3688_3690delGAG	p.Glu1230del	chr22:g.51159949_51159951delGAG	In-frame deletion		rs750680242	5/153384 (3.26e-5)
gnomAD	NA	c.3921_3923delGTC	p.Ser1309del	22:51160130TGTC>T	In-frame deletion	NA	NA	NA		NM_033517.1:c.3873_3875delGTC	p.Ser1293del	chr22:g.51160134_51160136delGTC	In-frame deletion		rs756304885	1/241516 (4.141e-6)
gnomAD	NA	c.3934_3936delGAG	p.Glu1312del	22:51160143TGAG>T	In-frame deletion	NA	NA	NA		NM_033517.1:c.3886_3888delGAG	p.Glu1296del	chr22:g.51160147_51160149delGAG	In-frame deletion			1/241350 (4.143e-6)	Note: This variant is multiallelic!
gnomAD	NA	c.4124_4126delAGG	p.Glu1375del	22:51160331TGGA>T	In-frame deletion	NA	NA	NA		NM_033517.1:c.4076_4078delAGG	p.Glu1359del	chr22:g.51160337_51160339delAGG	In-frame deletion			1/153380 (6.52e-6)
gnomAD	NA	c.4167_4169delAAG	p.Ser1390del	22:51160379CAAG>C	In-frame deletion	NA	NA	NA		NM_033517.1:c.4119_4121delAAG	p.Ser1374del	chr22:g.51160380_51160382delAAG	In-frame deletion			1/30920 (3.234e-5)	Warning! This variant is only covered in 15460 individuals (adjusted allele number = 30920). This means that the site is covered in fewer than 80% of the individuals in ExAC, which may indicate a low-quality site.
gnomAD	NA	c.4406_4420delGGCTGGCCTCTGCCG	p.Gly1469_Ala1473del	22:51160608CGCCTCTGCCGGGCTG>C	In-frame deletion	NA	NA	NA		NM_033517.1:c.4358_4372delGGCTGGCCTCTGCCG	p.Gly1453_Ala1457del	chr22:g.51160619_51160633delGGCTGGCCTCTGCCG	In-frame deletion		rs778439870	6/230938 (2.598e-5)	Note: This variant is multiallelic!
Moessner (2007) Am J Hum Genet	17999366	Del 4358–4372	p.G1453-A1457del	NA	In-frame deletion	SK0203	M	Maternally inherited (absent in affected sibling)	ASD	NM_033517.1:c.4358_4372delGGCTGGCCTCTGCCG	p.Gly1453_Ala1457del	chr22:g.51160619_51160633delGGCTGGCCTCTGCCG	In-frame deletion		rs778439870	6/230938 (2.598e-5)	Note: This variant is multiallelic!
gnomAD	NA	c.4599_4601delTGG	p.Gly1534del	22:51160808TTGG>T	In-frame deletion	NA	NA	NA		NM_033517.1:c.4551_4553delTGG	p.Gly1518del	chr22:g.51160812_51160814delTGG	In-frame deletion		rs766299545	4/239908 (1.667e-5)
gnomAD	NA	c.4999_5004delCCCGGC	p.Pro1667_Gly1668del	22:51169483TCCGGCC>T	In-frame deletion	NA	NA	NA		NM_033517.1:c.4951_4956delCCCGGC	p.Pro1651_Gly1652del	chr22:g.51169495_51169500delCCCGGC	In-frame deletion			2/92970 (2.151e-5)	Note: This variant is multiallelic! Warning! This variant is only covered in 46485 individuals (adjusted allele number = 92970). This means that the site is covered in fewer than 80% of the individuals in ExAC, which may indicate a low-quality site.
gnomAD	NA	c.4999_5004dupCCCGGC	p.Pro1667_Gly1668dup	22:51169483T>TCCGGCC	In-frame insertion	NA	NA	NA		NM_033517.1:c.4951_4956dupCCCGGC	p.Pro1651_Gly1652dup	chr22:g.51169495_51169500dupCCCGGC	In-frame insertion			5/120740 (4.141e-5)	Note: This variant is multiallelic! Warning! This variant is only covered in 46485 individuals (adjusted allele number = 92970). This means that the site is covered in fewer than 80% of the individuals in ExAC, which may indicate a low-quality site.
Waga (2011) Psychiatr Genet	21378602	c.4948insGGCCCC	p.1650insGP	NA	In-frame insertion	NA (Present in 1 patient and 2 of 224 controls)	NA	NA	ASD	NM_033517.1:c.4949_4950insGCCCCG	p.Pro1651_Gly1652insArgPro	chr22:g.51169493_51169494insGCCCCG	In-frame insertion			0
Redin (2014) J Med Genet	25167861	NM_001080420.1:c.5090_5092del	p.His1697del	chr22:g.51169586_51169588del	In-frame deletion	APN-32	M	NA	ID	NM_033517.1:c.5042_5044delACC	p.His1681del	chr22:g.51169586_51169588delACC	In-frame deletion			0
All genomic positions refer to human genome build GRCh37/hg19.
F, female; M, male; NA, not available
a The variants in gnomAD are annotated in what they consider the canonical transcript, ENST00000262795, which is missing the beginning of exon 11 and contains 3 extra unvalidated exons. The correct reference sequence (NM_033517.1) is not included among the available transcripts.
b This paper reports a purported frameshift variant in "exon 11" identified by a commercial laboratory; they show that the variant is intronic and the mistake occurred because the commercial laboratory used the wrong RefSeq (NM_001080420.1), which contained a false "exon 11", not supported by transcript data.
c This variant is included in the part of exon 11 that is missing in the UCSC Genome Browser, and is thus likely a misannotation.
d Consequence in a non-canonical transcript according to gnomAD.
e The genomic change for this variant could not be reannotated because it falls in the part of exon 11 that is missing in the UCSC Genome Browser
